1                   **A study of knowledge, experience and beliefs about**  
2                   **hepatitis B virus (HBV) infection in south western Uganda**

3

4

5                   Joseph Mugisha<sup>1\*</sup>, Jolynne Mokaya<sup>2\*</sup>, Dominic Bukenya<sup>1</sup>, Fatuma Ssembajja<sup>1</sup>,  
6                   Denis Mayambala<sup>1</sup>, Robert Newton<sup>1,3</sup>, Philippa C Matthews<sup>2,4,5#</sup> Janet Seeley<sup>1,6#</sup>

7

8

9                   <sup>1</sup>Medical Research Council/Uganda Virus Research Institute and London School of  
10                   Hygiene and Tropical Medicine Uganda Research Unit, Entebbe, Uganda;

11                   <sup>2</sup>Nuffield Department of Medicine, University of Oxford, Medawar Building for  
12                   Pathogen Research, South Parks Road, Oxford OX1 3SY, UK;

13                   <sup>3</sup>Department of Health Sciences, University of York, York, United Kingdom;

14                   <sup>4</sup>Department of Infectious Diseases and Microbiology, Oxford University Hospitals  
15                   NHS Foundation Trust, John Radcliffe Hospital, Headington, Oxford OX3 9DU, UK;

16                   <sup>5</sup>Oxford Biomedical Research Centre, John Radcliffe Hospital, Headington,  
17                   Oxford OX3 9DU, UK;

18                   <sup>6</sup>Department of Global Health and Development, London School of Hygiene and  
19                   Tropical Medicine, Tavistock Place, London, UK;

20

21

22                   \* These authors contributed equally

23                   # These authors contributed equally

24

25

26                   **KEY WORDS**

27                   Stigma, hepatitis, infection, Uganda, Africa, HBV

28

29                   **CORRESPONDING AUTHOR**

30                   Philippa Matthews, [philippa.matthews@ndm.ox.ac.uk](mailto:philippa.matthews@ndm.ox.ac.uk)

31

32 **ABBREVIATIONS**

- 33       • AIDS – Acquired Immunodeficiency Syndrome
- 34       • GPC – general population cohort, Uganda
- 35       • HBV – hepatitis B virus
- 36       • HIV – human immunodeficiency virus
- 37       • sSA – sub Saharan Africa
- 38       • UK MRC – United Kingdom Medical Research Council
- 39       • WHO – World Health Organisation

40

41 **ABSTRACT**

42 **Introduction:** United Nations sustainable development goals aim for the elimination  
43 of viral hepatitis as a public health threat by 2030, leading to efforts to upscale the  
44 availability and accessibility of hepatitis B virus (HBV) vaccination, diagnosis and  
45 treatment globally. However, a variety of societal factors, including beliefs, traditions,  
46 and stigma, can be a major obstacle to all of these interventions. We therefore set  
47 out to investigate how HBV is understood and described in communities in Uganda,  
48 and whether there is evidence of potential stigma.

49 **Method:** We carried out a qualitative formative study in two sites in South Western  
50 Uganda: a village in Kalungu district (site A) and an area on the outskirts of Masaka  
51 town (site B). We undertook a rapid assessment to investigate how adults describe  
52 HBV infection and their perceptions about the infection. We collected data by  
53 conducting a transect walk, observations, community group discussions, and in-  
54 depth interviews, sampling a total of 131 individuals. We used inductive content  
55 analysis to extract key themes associated with HBV.

56 **Results:** There is no specific word for HBV infection in local languages, and  
57 knowledge about this infection is varied. While some individuals were completely  
58 unfamiliar with HBV infection, some had heard of HBV. Radio was a common source  
59 of information. There was awareness of HBV as a cause of liver disease, limited  
60 knowledge regarding the cause, mode of transmission and treatment. Stigma in HBV  
61 may be rare in this community due to limited understanding and experience of HBV.

62 **Conclusion:** There is an ongoing need to improve awareness and understanding of  
63 HBV in this community. Careful dissemination of accurate information is required to  
64 promote acceptance of interventions for prevention, diagnosis and treatment.

## 65 INTRODUCTION

66 Globally, approximately 290 million people are chronically infected with hepatitis B  
67 virus (HBV), and more than 800,000 people consequently die each year from liver  
68 cirrhosis or liver cancer (1). In response to the United Nations Sustainable  
69 Development Goals, which aim to eliminate viral hepatitis as a public health threat by  
70 the year 2030 (2), HBV infection is receiving increasing recognition with efforts to  
71 upscale prevention, diagnosis and treatment (1,3). However, there are complex  
72 barriers to the elimination of this infection in the African subcontinent, including a  
73 high prevalence of chronic infection ( $\geq 8\%$  in many settings),  $>90\%$  of those infected  
74 being undiagnosed, and poor awareness (4,5).

75

76 Stigma and discrimination are recognised in the setting of chronic viral hepatitis  
77 infections, but there is very limited research to determine the nature and impact of  
78 stigma in communities in Africa (4). To date, only three studies have been carried out  
79 in Africa exploring the social impact of HBV. In Zambia, stigma has been reported to  
80 be a barrier to HBV disclosure and referral of contacts for testing (6), whereas in  
81 Ghana, low levels of knowledge and pervasive misconceptions about HBV contribute  
82 towards psychological and social problems among individuals with chronic infection  
83 (7,8). There has been no previous work on stigma in HBV in Uganda, although HBV  
84 is highly endemic in some regions (prevalence estimates vary from 6-52% (9–11)).

85

86 Given the high prevalence of HBV in Uganda, and the emerging evidence of stigma  
87 in HBV, we sought to investigate how adolescents and adults in rural and peri-urban  
88 communities in Uganda describe HBV infection, their perceptions, beliefs and  
89 experiences about the infection and whether there is evidence of stigma.

90

## 91 METHODS

### 92 Study setting

93 We conducted the study at two sites in South West Uganda:

- 94 i. Site A: This is a village location within the General Population Cohort (GPC).  
95 The GPC was established in a rural population in south-western Uganda in  
96 Kyamulibwa sub-county of Kalungu district in 1989, with the initial aim of  
97 studying the epidemiology of HIV/AIDS in a rural population, but subsequently  
98 also being a source of recruitment for other research studies (12,13). The

99 GPC comprises 25 study villages with a total population of approximately  
100 25,000 people. Most of the inhabitants practice small-scale farming. Local  
101 tribes are Baganda, Banyarwanda, Barundi, and Banyakole. A number of  
102 infectious diseases are prevalent, including HIV (prevalence ~10%), malaria,  
103 hepatitis B and C (HBV prevalence 3% HCV <1%), sexually transmitted  
104 infections and respiratory tract infections. Within this sub-county, there are a  
105 number of public and private health care facilities and traditional healers. We  
106 selected Site A for this study because a previous survey on HBV reported a  
107 higher prevalence within this village compared to elsewhere in the GPC  
108 (unpublished data).

109

110 ii. Site B: This is a peri-urban site in Masaka Municipality, located along the  
111 highway that connects Uganda to the Democratic Republic of Congo,  
112 Tanzania and Rwanda, with a high concentration of low-cost housing. Most of  
113 the inhabitants earn their living from small businesses including motorcycle  
114 transport, selling food and running bars; crop farming is also undertaken  
115 locally. The tribes represented in this region are Baganda, Banyarwanda,  
116 Batoro and Basoga. The HIV prevalence in this setting may be slightly higher  
117 than within the GPC, but accurate data are not available. The prevalence of  
118 viral hepatitis infection is also not known but is likely to be higher than the  
119 GPC, given the concentration of settlements in the area and many inhabitants  
120 from different areas of Uganda. There are several private and public health  
121 care facilities in this site.

122

### 123 **Study design**

124 Between July and October 2018, we conducted a rapid qualitative assessment to  
125 investigate how HBV is described, the experiences and beliefs associated with HBV  
126 and the nature of any associated stigma. These rapid methods included transect  
127 walks, observations, introductory group sessions, community group discussions and  
128 in-depth interviews (Table 1), with the intention that the different methods  
129 complemented each other. Fieldwork was conducted at Site A first, after which the  
130 field team moved to Site B.

131

### 132 **Data collection**

133 Data collection was done by two social science research assistants who have an  
134 understanding of these communities and are fluent in Luganda, the local language  
135 commonly used within the study setting. The research assistants were first trained  
136 on all aspects of the study and the use of a rapid qualitative assessment approach  
137 (14). Before visits to the study communities, the research teams met with local  
138 leaders and explained the purpose of the study and sought permission to enter these  
139 communities. All the data were recorded using field notes that were expanded  
140 immediately after data collection.

141

142 **i. Transect spiral walk:** the aim was to observe, discuss and find key features  
143 in the community that would inform our other methodologies such as  
144 identifying settlement patterns, health centres, churches, mosques, traditional  
145 healers, trading centres, bars and any other places where people within  
146 communities concentrate. The transect walk was performed to understand the  
147 daily activities of people within the community in order to plan for the other  
148 assessment methods effectively. Two members of the research team first  
149 visited the local leader of each study site and explained the reasons of the  
150 activity within this community. With the help of the local leader, the team  
151 identified the centre of each village that was used as a starting point. The  
152 team then split into two with each person taking a different direction. They  
153 moved in concentric circles until the whole village was covered. During the  
154 walk, observations were made in addition to talking to a few people.

155 **ii. Observations:** informed by the transect walk, we visited particular places of  
156 interest to make observations. The team engaged with members of the  
157 community and healthcare providers (including traditional healers and village  
158 health teams (VHTs), with the aim of better understanding the characteristics  
159 of individuals seeking health care, how and where they are treated, common  
160 illnesses, familiarity with HBV including local terms to describe it, its signs and  
161 symptoms and any personal experience of individuals with HBV infection.

162 **iii. Introductory group sessions:** we met with ten influential people within each  
163 community including community leaders and local religious leaders, who had  
164 been identified based on information collected during the transect walks. The  
165 aim of these sessions was to understand perceptions and beliefs of diseases  
166 and illnesses in the community, and to explore understanding and

167 experiences of HBV infection. The sessions were moderated by one  
 168 interviewer, while the other was observing and taking notes.

169 **iv. Community group discussions:** we facilitated group discussions among  
 170 adolescents and adults to find out about perceptions and beliefs of disease  
 171 within the community, specifically exploring understanding and experiences of  
 172 HBV infection. Four discussions were held at each study site with ten  
 173 participants in each group. These participants were identified after the first  
 174 three visits within the study communities.

175 **v. In-depth individual interviews:** We interviewed a selected group of  
 176 individuals who were willing to give information about their experiences, to  
 177 allow deeper exploration of relevant issues established from the previous  
 178 stages.

179

180 **Table 1: Description of study areas and characteristics of study participants**

| <b>Method of data collection</b>      | <b>Data collected at Site A</b>                                                                                                                                                                                                                                                    | <b>Data collected at Site B</b>                                                                                                                                                                                                                                   |
|---------------------------------------|------------------------------------------------------------------------------------------------------------------------------------------------------------------------------------------------------------------------------------------------------------------------------------|-------------------------------------------------------------------------------------------------------------------------------------------------------------------------------------------------------------------------------------------------------------------|
| <b>Transect spiral walk</b>           | <b>Approximate population size:</b> 700 people<br><b>Main economic activity:</b> Farming/trading<br><b>Health facilities:</b> No health facility. Healthcare services sought from neighbouring villages.<br><b>Healthcare providers:</b> Retired midwife, VHTs, Traditional Healer | <b>Approximate population size:</b> 2,000 people<br><b>Main economic activity:</b> Trading<br><b>Health facilities:</b> a medical centre, pharmacies/drug stores<br><b>Healthcare providers:</b> Clinical Officers, Nurses, VHTs, Traditional Healers, Herbalists |
| <b>Observations</b>                   | Comments recorded from five individuals including traditional healers.                                                                                                                                                                                                             | Comments recorded from four individuals, including healthcare workers and herbal medicine seller.                                                                                                                                                                 |
| <b>Introductory group session</b>     | Discussion with community leaders (6 males, 5 females), aged 35-77.                                                                                                                                                                                                                | Discussion with community leaders (5 males, 5 females), aged 35-50.                                                                                                                                                                                               |
| <b>Community group discussions</b>    | Discussion with young females (n=10, aged 18-30), older females (n=12, aged 35-70), young males (n=9, aged 20-30), older males (n=9, aged 40-70).                                                                                                                                  | Discussion with young females (n=10, aged 20-35), older females (n=11, aged 35-70), young males (n=11, aged 18-30), older males (n=10, aged 35-55).                                                                                                               |
| <b>In-depth individual interviews</b> | 11 individuals (5 males; 6 females), aged 20-50                                                                                                                                                                                                                                    | 8 individuals (3 males; 5 females), aged 30-50                                                                                                                                                                                                                    |
| <b>Total number of participants</b>   | <b>67</b>                                                                                                                                                                                                                                                                          | <b>64</b>                                                                                                                                                                                                                                                         |

181

## 182 **Data management and analysis**

183 Researchers involved with data collection provided detailed description of their  
184 observations and interviews in accounts written up from the notes. Two other  
185 researchers reviewed the transcripts prior to analysis for to check the quality and  
186 accuracy, and thereafter independently coded the transcripts. Themes and sub-  
187 themes relating to perceptions, beliefs and experiences of HBV and the description,  
188 and nature of associated stigma, based on narrative content and research questions.  
189 Quotes used in the article are words of the interviewee used in the accounts.

190

## 191 **Ethical approvals**

192 Approval was provided by The Science and Ethics Committee of the Uganda Virus  
193 Research Institute (ethics no GC/127/18/05/645) and UK Oxford Tropical Ethics  
194 Committee, OxTREC, (ethics no. 516-18). All participants provided written informed  
195 consent for interviews and discussion groups. The local leaders provided verbal  
196 consent for the transect walks within their communities while health care providers,  
197 including traditional healers, consented for observations.

198

## 199 **Data availability**

200 Our study data are available on-line in the form of supplementary data, comprising a  
201 table of metadata and statements collected from 131 participants (Table S1), and a  
202 summary of key themes raised by the study (Table S2). These are available on-line  
203 at <https://figshare.com/s/0cac69e7e69ee1f94e65> (this link will be converted to a  
204 permanent DOI on acceptance of the manuscript for publication).

205

## 206 **RESULTS**

### 207 **Study participants**

208 Between September and December 2018, we collected data from a total of 131  
209 participants across Sites A and B. Table 1 summarises the description of study areas  
210 and socio-demographic characteristics of study participants.

211

### 212 **Knowledge and awareness of HBV infection**

213 Awareness of HBV infection in these communities was varied. The commonest  
214 means of acquiring knowledge on HBV infection was through radio advertisements



215 which encouraged members of the community to get tested and immunised  
216 (reported by 31 participants, age range 18-70 years). Others had personal  
217 experience of knowing someone perceived to be infected or diagnosed with HBV  
218 (reported by 30 individuals, age range 18 – 70 years). Among these respondents, 20  
219 reported the death of individuals perceived to have HBV infection shortly after  
220 admission to a healthcare facility or as soon as they became symptomatic. One  
221 personal experience was reported by a teacher from site B: *“A neighbour who had  
222 gone to work at the lake shore came back when he was already infected. He was  
223 referred to a hospital in Kampala but died after two days”*.

224

225 There were some participants who reported not having heard of HBV infection and  
226 therefore felt that it may not be a common illness, including both males and females  
227 from both settings. There is no specific name for HBV infection; naming of a disease  
228 in this community commonly depends on the symptoms of the disease. The local  
229 phrases used to describe liver disease are *“Obulwadde bwekibumba”* and  
230 *“endwadde y'ekibumba”* which literally translate to ‘the liver is sick’.

231

### 232 **Insights into HBV as a cause of liver disease**

233 As the symptoms and signs of HBV are not distinct from other causes of liver  
234 disease, there may be poor understanding of the role of an infectious agent. This is  
235 illustrated from a comment recorded from the community group discussions at site A,  
236 *“We do not know about its mode of transmission, signs and causes so we cannot tell  
237 if the disease exists in the community”*. Three participants specifically reported that  
238 they are not able to distinguish HBV from other illnesses.

239

240 More generally, some participants were able to list other causes of liver disease  
241 including excessive consumption of alcohol and eating fatty foods. Insect bites,  
242 exposure to pesticides/fertilisers and drinking dirty water were also suggested as  
243 causes of liver disease. For example, a man at Site B commented that: *“it could be  
244 caused through excessive drinking of waragi [local gin]... myrrh, khat drugs, herbal  
245 medicine, and fertilisers/pesticides can affect and make the liver sick”*, while a  
246 woman of a similar age in Site A suggested that it was caused by *“walking through  
247 dirty swamp water which contains certain germs that cause liver disease”*. Some of  
248 the symptoms that participants reported in association with HBV (or more generally

249 with liver disease) included abdominal or whole body swelling, jaundice/yellow eyes,  
250 weight loss, and hair loss. Three participants mentioned that HBV was  
251 asymptomatic. Thirteen participants, mainly from Site A, were not able to suggest  
252 any signs or symptoms associated with HBV. Eight participants (aged 18-60 years)  
253 reported a similarity in signs and symptoms between HIV and HBV.

254

### 255 **Perceptions of mode of transmission**

256 A number of participants, predominantly from Site B, reported that they did not know  
257 how HBV is transmitted. Three people believed that transmission routes included  
258 sharing of public toilets/bathrooms, or sharing of utensils and clothing. A male at site  
259 B stated: *“When he shares any equipment - say clothing, cups and forks with a  
260 person who looked malnourished - he would feel as if he was to contract the  
261 infection from him/her, not good to share anything with the patient”*.

262

263 Of the eight healthcare professionals who took part in this study, only five knew that  
264 HBV is sexually transmitted and can also be transmitted through other exposures to  
265 infected body fluids. Five participants from Site A reported that anyone was at risk of  
266 contracting HBV. People who consumed alcohol or those who engage in risky sexual  
267 behaviours were considered to be at risk of contracting HBV infection. One  
268 participant interpreted the high-profile campaigns around HBV immunisation for  
269 adults as suggesting that only adults were susceptible to infection.

270

### 271 **Knowledge of, and access to, HBV treatment**

272 Community members suggested possible management interventions, including  
273 modified diet and herbal medicine. Twelve participants, mostly from Site A (age  
274 range 18-70 years), did not know any treatment for HBV. Three young men from Site  
275 B reported that HBV has no cure. Others correctly recognised that antiretroviral  
276 drugs can be used in managing HBV infection, and that those infected are put-on  
277 long-term treatment, but some of the comments suggested that there is pessimism  
278 about outcomes, with participants suggesting poor chances of survival.

279

### 280 **Potential challenges facing HBV management**

281 The asymptomatic nature of HBV can be a barrier to seeking healthcare services;  
282 some community members only seek treatment when the symptoms are noticeable

283 and have worsened, and it may be common to stop taking medication in the absence  
284 of symptoms. Poverty, preference for traditional/herbal medicine and lack of  
285 awareness about a disease, can also contribute to delays in seeking healthcare and  
286 be barriers to seeking preventive, diagnostic and treatment services among  
287 members of the community. A description of a child unwell as a result of HBV  
288 infection was provided by a male participant at Site A: *“When the boy fell sick, he  
289 was taken to the health centre for treatment. He was not admitted but they gave him  
290 some tablets which he didn’t understand. He took the tablets and after a week the  
291 stomach normalized. About 3 weeks later, the stomach resumed swelling. He was  
292 taken to herbal clinic and was given 5 litres of herbal medicine and he was told to go  
293 back after one week. When the herbal was finished, he went back and still he was  
294 given the same drugs. By that time his eyes had a yellowish colour, his urine was  
295 also yellow”.*

296

297 Lack of diagnostic facilities, and limited access to healthcare professionals and  
298 medications contribute to the challenges facing HBV prevention, diagnosis and  
299 therapy in this community. A female healthcare worker at site A explained: *“She can’t  
300 even give that patient any drug, only refers him or her to Masaka hospital. She said  
301 that they don’t have the machines that can diagnose it, so they have to refer the  
302 patient.”* Among healthcare workers, poor knowledge can impede diagnosis and  
303 treatment for HBV infection. Three healthcare professionals reported not having  
304 received a complete course of HBV vaccination themselves and are therefore at  
305 increased risk of becoming infected.

306

### 307 **Community perceptions and experience of HBV**

308 We sought to understand the perception of community members about the  
309 occurrence and persistence of HBV infection in their community. Eleven participants,  
310 mostly from Site B reported that HBV was a new infection in their community  
311 because they had become aware of it only recently. For ten people who commented  
312 that HBV was a long-standing problem, their knowledge came from a community  
313 member known to them whom they believed had died of the infection. Others  
314 claimed that HBV was “an old sickness” which had been in the communities for a  
315 long time.

316

## 317 **Emotional responses to HBV infection**

318 Communities tend to fear diseases based on symptoms and outcomes associated  
319 with the disease. In particular, a disease can be feared because it is incurable and  
320 may be seen as leading inevitably to death(4). Stigma may stem from this fear, as  
321 well as from changes in body appearance that can limit interactions with other  
322 community members. Eight participants, primarily from Site B, reported that they  
323 would be scared or more cautious to take care of someone with an infectious  
324 disease. Ten participants, mostly men from Site B (age 18–50 years), reported a  
325 feeling of shame associated with sexually transmitted diseases. However, eleven  
326 participants, reported no fear or shame towards people infected with HBV, partly  
327 because it is a disease that is not well known within the community.

328

## 329 **DISCUSSION**

330 With the recent increased attention regarding the urgent need to upscale prevention,  
331 diagnosis and treatment of HBV infection globally, understanding the social impact of  
332 HBV infection in communities is important as this influences acceptability and impact  
333 of interventions. To date, there is very limited research on behaviour and beliefs  
334 surrounding HBV infection in Africa.

335

336 Familiarity with HBV infection in the communities we investigated can be explained,  
337 in part, by the recent efforts by the Ministry of Health in Uganda to combat  
338 transmission of HBV by promoting vaccination among adolescents and young adults  
339 (15), particularly using radio messages to reach a wide audience. As a result, the  
340 syndrome of HBV infection is now recognised by many adults in this setting.  
341 However, even among healthcare workers, there is still a lack of in-depth  
342 understanding, in keeping with similar studies in Ghana and Zambia (4,6–8). The  
343 importance of education is highlighted by a study of HBV infection undertaken in  
344 Turkey(16).

345

346 Naming of a disease can be a reflection of how much it is recognised and  
347 understood (17,18). In our study population, local names used to describe diseases  
348 are based on the symptoms the sufferer bears. In part, this practice is encouraged  
349 by the WHO which states that a name of a disease should be based on the  
350 'symptoms, disease manifestation, severity and, if known, the pathogen causing the

351 disease' (19). Naming HBV infection poses a challenge, since there is no specific  
352 symptom that distinguishes it from other liver diseases, and in many instances, it  
353 remains asymptomatic until the end-stages of infection. Although we identified local  
354 terms that broadly describe liver disease, gaps remain in understanding of HBV  
355 infection, particularly with regard to the infectious agent (19).

356

### 357 **Stigma**

358 As a result of limited understanding and experience of HBV in our study population,  
359 stigma did not emerge as a strong theme. However, fear of symptoms and outcomes  
360 of a disease, as well as shame associated with mode of transmission of infection,  
361 can determine how those infected might be handled within their communities (20,21),  
362 and can lead on to stigma. Although sex is not the main route of transmission of HBV  
363 infection, this association could nevertheless lead to stigma and discrimination (22).  
364 Although HBV is asymptomatic in most cases, acute infection or advanced stages of  
365 the disease could result in visible manifestations, leading to isolation and lack of  
366 support from community members. Careful dissemination of accurate information on  
367 HBV is required to prevent possible stigma and misperceptions of personal risk.

368

369 Studies from Asia have reported stigma and limited knowledge among health  
370 practitioners as obstacles in the uptake of preventive, diagnostic and treatment  
371 services among HBV patients (4,23). Delayed health seeking behaviour has been  
372 widely reported in tuberculosis and is a result of several factors such as lack of  
373 symptoms, low patient knowledge, practising self-medication, and the use of  
374 traditional healing methods (24–26). In our study, the asymptomatic nature of HBV,  
375 poverty and lack of knowledge (including among healthcare workers) were  
376 challenges in accessing timely and appropriate healthcare (27). While there are  
377 efforts to improve knowledge on HBV among healthcare professionals and  
378 community members in Uganda, studies are needed to evaluate the evidence of  
379 effectiveness of these interventions, and to evaluate availability, accessibility and  
380 integration of HBV services.

381

### 382 **Strength and limitations of this study**

383 This is the first study to explore beliefs, understanding and stigma around HBV  
384 infection in Uganda. A strength of the study was that we sampled participants from

385 both urban and rural settings, sampling men and women and including a diverse  
386 range of ages which afforded a comparison for HBV description, experiences and  
387 understanding. This approach provides some valuable reflections and insights into  
388 local understanding and beliefs about HBV infection, but represents only a small  
389 number of adults, who self-selected to participate.

390

### 391 **Conclusions**

392 Engaging local communities, understanding barriers, and providing appropriate and  
393 accessible information will be a crucial undertaking if diagnosis, treatment and  
394 preventive strategies are to be rolled out to support progress towards the 2030  
395 sustainable development goal targets for elimination of HBV infection as a public  
396 health threat. Although radio campaigns have raised some local awareness of HBV  
397 in the communities we studied in Uganda, there remain significant gaps in  
398 knowledge and understanding, and a risk of stigma associated with fear, especially  
399 in the context of physical signs of liver disease. Educating traditional healers and  
400 healthcare workers could have a positive impact on disseminating information.  
401 Further studies are needed to investigate the societal responses to HBV infection in  
402 other African populations, and to establish the best ways to engage with local  
403 populations to promote access to interventions.

404

## 405 **SUPPLEMENTARY DATA**

406 Supplementary data are available on line at Figshare:

407 (<https://figshare.com/s/0cac69e7e69ee1f94e65>).

408 This will be converted to a permanent DOI on acceptance of the paper for  
409 publication.

410

411 **S1 Table: Data extraction summarising responses to discussion about**  
412 **knowledge, experience and beliefs about Hepatitis B virus infection from 131**  
413 **study participants in Uganda.** Table summarises feedback from individuals and  
414 group discussions.

415

416 **S2 Tables: Common themes obtained from analysing responses obtained from**  
417 **study participants participating in discussion about knowledge, experience**  
418 **and beliefs about Hepatitis B virus infection in Uganda.** These represent  
419 responses from all individuals represented in the study. Note there is not a defined  
420 denominator, as there were differing approaches to approach discussion with study  
421 participants.

422

423

## 424 **FUNDING**

425 JMo is funded by Leverhulme Mandela Rhodes Doctoral Scholarship. PCM is funded  
426 by the Wellcome Trust (grant ref 110110). The SHEBA project was supported by a  
427 project grant from the Medical Research Council Global Challenges Research Fund,  
428 GCRF (Principal Investigator Philippa Matthews). The MRC/UVRI and LSHTM is  
429 jointly funded by the UK Medical Research Council (MRC) and the UK Department  
430 for International Development (DFID) under the MRC/DFID Concordat agreement  
431 and is also part of the EDCTP2 programme supported by the European Union. The  
432 Uganda General Population Cohort (GPC) staff have received support from THRiVE  
433 (<https://thrive.or.ug/>).

434

## 435 **ACKNOWLEDGEMENTS**

436 Nil

437

## 438 **CONFLICTS OF INTEREST**

439 Nil

440

## 441 REFERENCES

- 442 1. World Health Organisation. Global hepatitis report, 2017. WHO. 2017;
- 443 2. World Health Organisation. Global health sector strategy on viral hepatitis  
444 2016-2021.
- 445 3. Cooke GS, Andrieux-Meyer I, Applegate TL, Atun R, Burry JR, Cheinquer H,  
446 et al. Accelerating the elimination of viral hepatitis: a Lancet Gastroenterology  
447 & Hepatology Commission. *Lancet Gastroenterol Hepatol*. 2019;4(2):135–84.
- 448 4. Mokaya J, McNaughton AL, Burbridge L, Maponga T, O'Hara G, Andersson  
449 M, et al. A blind spot? Confronting the stigma of hepatitis B virus (HBV)  
450 infection - A systematic review. *Wellcome Open Res*. 2018;3:29.
- 451 5. O'Hara GA, McNaughton AL, Maponga T, Jooste P, Ocamo P, Chilengi R, et  
452 al. Hepatitis B virus infection as a neglected tropical disease. *PLoS Negl Trop*  
453 *Dis* . 2017;11(10):e0005842.
- 454 6. Franklin S, Mouliom A, Sinkala E, Kanunga A, Helova A, Dionne-Odom J, et  
455 al. Hepatitis B virus contact disclosure and testing in Lusaka, Zambia: a  
456 mixed-methods study. *BMJ Open*. 2018;8(9):e022522.
- 457 7. Mkandawire P, Richmond C, Dixon J, Luginaah IN, Tobias J. Hepatitis B in  
458 Ghana's upper west region: a hidden epidemic in need of national policy  
459 attention. *Health Place*. 2013 Sep;23:89–96.
- 460 8. Adjei CA, Naab F, Donkor ES. Beyond the diagnosis: a qualitative exploration  
461 of the experiences of persons with hepatitis B in the Accra Metropolis, Ghana.  
462 *BMJ Open*. 2017 Nov;7(11):e017665.
- 463 9. Ochola E, Ocamo P, Orach CG, Nankinga ZK, Kalyango JN, McFarland W, et  
464 al. High burden of hepatitis B infection in Northern Uganda: results of a  
465 population-based survey. *BMC Public Health*. 2013;13(1):727.
- 466 10. Bayo P, Ochola E, Oleo C, Mwaka AD. High prevalence of hepatitis B virus  
467 infection among pregnant women attending antenatal care: a cross-sectional  
468 study in two hospitals in northern Uganda. *BMJ Open*. 2014;4(11):e005889.
- 469 11. Bwogi J, Braka F, Makumbi I, Mishra V, Bakamutumaho B, Nanyunja M, et al.  
470 Hepatitis B infection is highly endemic in Uganda: findings from a national  
471 serosurvey. *Afr Health Sci*. 2009;9(2):98–108.
- 472 12. Asiki G, Murphy G, Nakiyingi-Miiró J, Seeley J, Nsubuga RN, Karabarinde A,



- 473 et al. The general population cohort in rural south-western Uganda: a platform  
474 for communicable and non-communicable disease studies. *Int J Epidemiol.*  
475 2013;42(1):129–41.
- 476 13. Asiki G, Murphy GA V, Baisley K, Nsubuga RN, Karabarinde A, Newton R, et  
477 al. Prevalence of dyslipidaemia and associated risk factors in a rural  
478 population in South-Western Uganda: a community based survey. *PLoS One.*  
479 2015;10(5):e0126166.
- 480 14. Bond V, Ngwenya F, Murray E, Ngwenya N, Viljoen L, Gumede D, et al. Value  
481 and Limitations of Broad Brush Surveys Used in Community-Randomized  
482 Trials in Southern Africa. *Qual Health Res.* 2019;29(5):700–18.
- 483 15. World Hepatitis Day 2018: Press statement on the progress of implementation  
484 of Hepatitis B vaccination program in Uganda  
485 [https://reliefweb.int/report/uganda/world-hepatitis-day-2018-press-statement-](https://reliefweb.int/report/uganda/world-hepatitis-day-2018-press-statement-progress-implementation-hepatitis-b)  
486 [progress-implementation-hepatitis-b](https://reliefweb.int/report/uganda/world-hepatitis-day-2018-press-statement-progress-implementation-hepatitis-b)
- 487 16. Tosun S, Aygün O, Özdemir HÖ, Korkmaz E, Özdemir D. The impact of  
488 economic and social factors on the prevalence of hepatitis B in Turkey. *BMC*  
489 *Public Health.* 2018;18(1):649.
- 490 17. Scully JL. What is a disease? *EMBO Rep.* 2004;5(7):650–3.
- 491 18. Shim K. Expanding the Definition of Infectious Disease. *J Glob Health.* 2015
- 492 19. World Health Organisation. WHO issues best practices for naming new  
493 human infectious diseases.
- 494 20. Mahajan AP, Sayles JN, Patel VA, Remien RH, Sawires SR, Ortiz DJ, et al.  
495 Stigma in the HIV/AIDS epidemic: a review of the literature and  
496 recommendations for the way forward. *AIDS.*2008;22 Suppl 2(Suppl 2):S67-  
497 79.
- 498 21. Halli SS, Khan CGH, Moses S, Blanchard J, Washington R, Shah I, et al.  
499 Family and community level stigma and discrimination among women living  
500 with HIV/AIDS in a high HIV prevalence district of India. *J HIV AIDS Soc Serv.*  
501 2016;1–16.
- 502 22. Blanas DA, Nichols K, Bekele M, Shankar H, Bekele S, Jandorf L, et al.  
503 Adapting the Andersen model to a francophone West African immigrant  
504 population: hepatitis B screening and linkage to care in New York City. *J*  
505 *Community Health.* 2015 Feb;40(1):175–84.
- 506 23. Lee H, Fawcett J, Kim D, Yang JH. Correlates of Hepatitis B Virus-related

- 507 Stigmatization Experienced by Asians: A Scoping Review of Literature. Asia-  
508 Pacific J Oncol Nurs. 2016;3(4):324.
- 509 24. Mbuthia GW, Olungah CO, Ondicho TG. Health-seeking pathway and factors  
510 leading to delays in tuberculosis diagnosis in West Pokot County, Kenya: A  
511 grounded theory study. PLoS One.2018;13(11):e0207995.
- 512 25. Chimbatata NBW, Zhou C-M, Chimbatata CM, Xu B. Post-2015, why delay to  
513 seek healthcare? Perceptions and field experiences from TB healthcare  
514 providers in northern Malawi: a qualitative study. Infect Dis Poverty.  
515 2017;6(1):60.
- 516 26. Seid A, Metaferia Y. Factors associated with treatment delay among newly  
517 diagnosed tuberculosis patients in Dessie city and surroundings, Northern  
518 Central Ethiopia: a cross-sectional study. BMC Public Health. 2018;18(1):931.
- 519 27. Lemoine M, Thursz MR. Battlefield against hepatitis B infection and HCC in  
520 Africa. Hepatology. 2017; 66.
- 521
